# Supplementary material
Source: PubMed Central journal article supplement (PMC4896086)

**Supplemental Figure 1. Error rate estimation.** We used high frequency clonal expansions to derive an error rate based on how many sequences should be considered erroneous. Because our sequences are approximately all the same length this is a reasonable procedure. We show two examples with a benchmark sequence and those that are considered errors. The type of error is noted as well as the position of the error(s). The count of high frequency clonotypes was not corrected; only the erroneous sequences removed. Under the assumption that 1 of every 50 sequences is incorrect. Every fifty singletons (clonotype observed once) could have one erroneous counterpart. The same would hold for every 25 doubletons, etc.

**Supplemental Figure 2. Relation between CDR3 and NDN length.** The relation of CDR3 length (column) to NDN length (row) is shown for A. Clonotypes, and B. Observations. The data are shaded to represent relative frequency of CDR3 length for each NDN length. The sum for NDN length is given in the bottom row. The sum for each CDR3 length is given in the right-most column.

**Supplemental Figure 3. Amino acid usage based on NDN start position.** The amino acid utilization is shown for clonotypes whose NDN starts at: A. CDR3 position 2, B CDR3 position 3, C. CDR position 4, and D. CDR3 position 5. The data are shown as relative frequency of each amino acid for each start. The data values are shaded to show relative frequency. Amino acids that are V encoded are boxed. The start column for each panel was also shown in Figure 5B. The amino acids are identified in the left-most column and are in the same order as in Figure 5.

**Supplemental Figure 4. Rank frequency data.** For each panel the X-axis is the natural log of the rank and the Y axis is the natural log of the rank frequency. The slope, intercept and  $R^2$  value for each trend line are shown in each panel except for A. **A. Rank frequency plot of 2aa motif data.** As described in the text the doublet motif data could not be fit to a line. **B. Doublet motifs from clonotypes of CDR3 length 11.** The data are further divided into subsets based on NDN start position. The NDN start positions (2 to 5) are identified in each panel. **C. Doublet motifs from clonotypes of CDR3 length 12 further divided by NDN start position.** **D. Doublet motifs of clonotypes of CDR3 length 13 further divided by NDN start position.** **E. Doublet motifs of clonotypes of CDR3 length 14 further divided by NDN start position.**

Supplemental Figure 1

| Clonotype Name                 | J   | Count | Type           | Change           | Region |      |
|--------------------------------|-----|-------|----------------|------------------|--------|------|
| sMMAYe.1111B19S1B21L10         | 2S1 | 1731  |                | Benchmark        |        |      |
| sMLAYe.1611B19S1B21L10         | 2S1 | 1     | transversion   | ATG to CTG       | NDN    |      |
| sMMAYe.1121B19S1B21L10         | 2S1 | 2     | transition     | GCT to GCC       | NDN    |      |
| sMMAYe.1141B19S1B21L10         | 2S1 | 1     | transversion   | GCT to GCG       | NDN    |      |
| sMMTYe.1111B19S1B21L10         | 2S1 | 1     | transition     | GCT to ACT       | NDN    |      |
| sMMVYe.1111B19S1B21L10         | 2S1 | 4     | transition     | GCT to GTT       | NDN    |      |
| sMTAYe.1411B19S1B21L10         | 2S1 | 6     | transition     | ATG to ACG       | NDN    |      |
| sMVAYe.1411B19S1B21L10         | 2S1 | 3     | transition     | ATG to GTG       | NDN    |      |
| sMMAYEq.11111B19S1B21L10       | 2S1 | 1     | transition     | GAG to GAA       | J      |      |
| sMMAYEQf.111121B19S1B21L10     | 2S1 | 1     | transition     | CAG to CAA       | J      |      |
| sMMAYEOf.111122B19S1B21L10     | 2S1 | 3     | transition     | CAG to TAG*      | J      |      |
| sMMAYEQLf.1111224B19S1B21L10   | 2S1 | 2     | transition     | TTC to CTC       | J      |      |
| sMMAYEQSf.1111222B19S1B21L10   | 2S1 | 5     | transition     | TTC to TCC       | J      |      |
| sMMAYERf.111124B19S1B21L10     | 2S1 | 1     | transition     | CAG to CGG       | J      |      |
| sMMAYGq.11114B19S1B21L10       | 2S1 | 5     | transition     | GAG to GGG       | J      |      |
| sMMAMSSSf.1111651B19S1B21L10   | 2S1 | 1     | frame-shift    | GAG to AG        | J      |      |
|                                |     |       |                | sum errors       | 37     | 2.1% |
| sFRSGq.2662B19S1B15L11         | 1S5 | 1903  |                | Benchmark        |        |      |
| sSFRSGq.62662B19S1B15L11       | 1S5 | 3     | transition     | AGT to AGC       | V      |      |
| sGFRSGq.12662B19S1B15L11       | 1S5 | 1     | transition     | AGT to GGT       | V      |      |
| aSSFRSGq.652662B19S1B15L11     | 1S5 | 1     | transition     | AGT to AGC       | V      |      |
| aGSFRSGq.152662B19S1B15L11     | 1S5 | 5     | transition     | AGT to GGT       | V      |      |
| sFRSGq.2661B19S1B15L11         | 1S5 | 1     | transition     | AGG to GGG       | NDN    |      |
| sFGSGq.2462B19S1B15L11         | 1S5 | 1     | transition     | GGC to GGT       | NDN    |      |
| sFRGDq.2622B19S1B15L11         | 1S5 | 2     | transition x 2 | AGCGGC to GGCGAC | NDN    |      |
| sFRGGq.2622B19S1B15L11         | 1S5 | 5     | transition     | AGC to GGC       | NDN    |      |
| sFRSDq.2662B19S1B15L11         | 1S5 | 11    | transition     | GGC to GAC       | NDN    |      |
| sFRSSq.2666B19S1B15L11         | 1S5 | 1     | transition     | GGC to AGC       | NDN    |      |
| sFRSGPp.26624B19S1B15L11       | 1S5 | 2     | transversion   | CAG to CCG       | J      |      |
| sFRSGRp.26624B19S1B15L11       | 1S5 | 6     | transition     | CAG to CGG       | J      |      |
| sFRSGQPRh.2662224B19S1B15L11   | 1S5 | 1     | transition     | CAG to CGG       | J      |      |
| sFRSGQPQRf.26622223B19S1B15L11 | 1S5 | 1     | transition     | CAT to CGT       | J      |      |
| sFRSGQPQHf.26622221B19S1B12L11 | 1S2 | 3     | transition     | CAT to CAC       | J      |      |
| sFRSGQPQAf.26622223B19S1B15L11 | 1S5 | 1     | frame-shift    | CAT to GCAT      | J      |      |
| sFRSGQPSYf.26622261B19S1B15L11 | 1S5 | 1     | frame-shift    | CCC to CC        | J      |      |
| sFRSGPAPAf.26643233B19S1B15L11 | 1S5 | 1     | frame-shift    | CCC to CCCG      | J      |      |
|                                |     |       |                | sum errors       | 47     | 2.4% |

Supplemental Figure 2

**A**

| CDR3 L | Clonotypes |     |     |      |      |      |      |      |     |     |    |    | sum  |
|--------|------------|-----|-----|------|------|------|------|------|-----|-----|----|----|------|
|        | NDN length |     |     |      |      |      |      |      |     |     |    |    |      |
|        | 1          | 2   | 3   | 4    | 5    | 6    | 7    | 8    | 9   | 10  | 11 | 12 |      |
| 02     | 1          |     |     |      |      |      |      |      |     |     |    |    | 1    |
| 03     | 2          |     |     |      |      |      |      |      |     |     |    |    | 2    |
| 04     | 2          | 1   |     |      |      |      |      |      |     |     |    |    | 3    |
| 05     |            | 3   |     | 1    |      |      |      |      |     |     |    |    | 4    |
| 06     | 1          |     |     | 1    |      |      |      |      |     |     |    |    | 2    |
| 07     | 2          | 2   | 5   | 1    | 1    |      |      |      |     |     |    |    | 11   |
| 08     | 6          | 9   | 17  | 9    | 1    | 2    |      |      |     |     |    |    | 44   |
| 09     | 22         | 78  | 109 | 79   | 42   | 11   | 1    |      |     |     |    |    | 342  |
| 10     | 10         | 120 | 250 | 275  | 147  | 48   | 8    | 2    |     |     |    |    | 860  |
| 11     | 9          | 141 | 576 | 960  | 644  | 202  | 70   | 7    | 1   |     |    |    | 2610 |
| 12     |            | 33  | 253 | 698  | 963  | 633  | 210  | 42   | 4   | 2   |    |    | 2838 |
| 13     |            | 2   | 123 | 481  | 949  | 934  | 513  | 120  | 28  | 1   |    | 1  | 3152 |
| 14     |            |     | 2   | 53   | 257  | 458  | 380  | 186  | 47  | 8   | 1  | 2  | 1394 |
| 15     |            |     |     | 2    | 55   | 118  | 185  | 127  | 78  | 15  | 3  | 1  | 584  |
| 16     |            |     |     |      | 1    | 23   | 47   | 82   | 46  | 26  | 6  | 2  | 233  |
| 17     |            |     |     |      |      |      | 18   | 30   | 33  | 17  | 12 | 4  | 114  |
| 18     |            |     |     |      |      |      |      | 7    | 12  | 16  | 3  | 6  | 44   |
| 19     |            |     |     |      |      |      |      |      | 4   | 8   | 4  | 2  | 18   |
| 20     |            |     |     |      |      |      |      |      |     |     | 2  | 1  | 3    |
| 21     |            |     |     |      |      |      |      |      |     |     |    | 2  | 2    |
| sum    |            | 55  | 389 | 1335 | 2560 | 3060 | 2429 | 1432 | 603 | 253 | 93 | 31 | 21   |

**B**

| CDR3 L | Observations |      |       |       |       |       |       |      |      |      |     |     | sum   |
|--------|--------------|------|-------|-------|-------|-------|-------|------|------|------|-----|-----|-------|
|        | NDN length   |      |       |       |       |       |       |      |      |      |     |     |       |
|        | 1            | 2    | 3     | 4     | 5     | 6     | 7     | 8    | 9    | 10   | 11  | 12  |       |
| 02     | 1            |      |       |       |       |       |       |      |      |      |     |     | 1     |
| 03     | 2            |      |       |       |       |       |       |      |      |      |     |     | 2     |
| 04     | 2            | 1    |       |       |       |       |       |      |      |      |     |     | 3     |
| 05     |              | 3    |       | 3     |       |       |       |      |      |      |     |     | 6     |
| 06     | 27           |      |       | 1     |       |       |       |      |      |      |     |     | 28    |
| 07     | 8            | 10   | 31    | 8     | 29    |       |       |      |      |      |     |     | 86    |
| 08     | 96           | 158  | 107   | 81    | 29    | 24    |       |      |      |      |     |     | 495   |
| 09     | 306          | 1711 | 1079  | 1366  | 356   | 78    | 5     |      |      |      |     |     | 4901  |
| 10     | 2895         | 1758 | 3651  | 7025  | 1967  | 573   | 70    | 14   |      |      |     |     | 17953 |
| 11     | 289          | 3411 | 9976  | 19684 | 13218 | 2286  | 748   | 49   | 4    |      |     |     | 49665 |
| 12     |              | 265  | 3968  | 9995  | 13020 | 7639  | 1627  | 320  | 43   | 2    |     |     | 36879 |
| 13     |              | 10   | 1883  | 12539 | 13523 | 17499 | 5917  | 1458 | 293  | 1    |     | 1   | 53124 |
| 14     |              |      | 88    | 2194  | 3714  | 11004 | 5128  | 2729 | 300  | 74   | 1   | 7   | 25239 |
| 15     |              |      |       | 28    | 1438  | 1559  | 1913  | 1125 | 1541 | 142  | 6   | 1   | 7753  |
| 16     |              |      |       |       | 8     | 128   | 799   | 941  | 502  | 210  | 41  | 20  | 2649  |
| 17     |              |      |       |       |       |       | 406   | 145  | 241  | 281  | 79  | 42  | 1194  |
| 18     |              |      |       |       |       |       |       | 76   | 167  | 2542 | 5   | 148 | 2938  |
| 19     |              |      |       |       |       |       |       |      | 37   | 127  | 27  | 9   | 200   |
| 20     |              |      |       |       |       |       |       |      |      |      | 4   | 12  | 16    |
| 21     |              |      |       |       |       |       |       |      |      |      |     | 22  | 22    |
| sum    | 3626         | 7327 | 20783 | 52924 | 47302 | 40790 | 16613 | 6857 | 3128 | 3379 | 163 | 262 |       |

Supplemental Figure 3

**A** Start at CDR3 position 2 (7.36%)

|   | 2    | 3    | 4    | 5    | 6    | 7    | 8    | 9    | 10   | 11   |
|---|------|------|------|------|------|------|------|------|------|------|
| G | 1.04 | 2.22 | 3.26 | 4.87 | 4.17 | 3.37 | 1.41 | 0.46 | 0.26 | 0.07 |
| S | 6.52 | 3.15 | 1.11 | 1.26 | 1.54 | 0.98 | 0.54 | 0.31 | 0.19 | 0.02 |
| T | 6.19 | 1.2  | 1.39 | 1.11 | 1.02 | 0.44 | 0.31 | 0.17 | 0.06 | 0.02 |
| A | 0.31 | 0.93 | 0.78 | 1.3  | 1.19 | 0.81 | 0.76 | 0.26 | 0.09 | 0.07 |
| R | 0.76 | 2.46 | 1.57 | 1.54 | 0.67 | 0.78 | 0.28 | 0.19 | 0.07 | 0.04 |
| L | 0.09 | 1.3  | 1.43 | 1.04 | 0.65 | 0.35 | 0.22 | 0.24 | 0.11 | 0    |
| P | 0.06 | 0.43 | 1.54 | 0.69 | 0.52 | 0.5  | 0.48 | 0.26 | 0.06 | 0.07 |
| I | 0.63 | 0.19 | 0.83 | 0.13 | 0.24 | 0.26 | 0.17 | 0.09 | 0.04 | 0.04 |
| D | 0    | 0.57 | 1.15 | 0.72 | 0.65 | 0.5  | 0.39 | 0.24 | 0.15 | 0.02 |
| V | 0.13 | 0.17 | 0.54 | 0.59 | 0.72 | 0.35 | 0.41 | 0.09 | 0.02 | 0.04 |
| Q | 0.02 | 1.09 | 0.7  | 0.69 | 0.67 | 0.11 | 0.2  | 0.06 | 0.04 | 0    |
| E | 0    | 0.57 | 0.41 | 0.3  | 0.56 | 0.31 | 0.19 | 0.11 | 0.09 | 0.04 |
| N | 0.37 | 0.54 | 0.22 | 0.24 | 0.28 | 0.26 | 0.28 | 0.15 | 0.15 | 0    |
| M | 0    | 0.19 | 0.11 | 0.17 | 0.11 | 0.09 | 0.15 | 0.04 | 0.06 | 0    |
| F | 0.02 | 0.13 | 0.24 | 0.35 | 0.28 | 0.35 | 0.15 | 0.19 | 0.02 | 0    |
| Y | 0    | 0.13 | 0.2  | 0.19 | 0.28 | 0.33 | 0.07 | 0.15 | 0.02 | 0.04 |
| W | 0.02 | 0.2  | 0.28 | 0.13 | 0.15 | 0.11 | 0.11 | 0.06 | 0.04 | 0.02 |
| H | 0.02 | 0.26 | 0.07 | 0.11 | 0.2  | 0.13 | 0.15 | 0.07 | 0.07 | 0.06 |
| K | 0.04 | 0.48 | 0.31 | 0.13 | 0.07 | 0.02 | 0.04 | 0.06 | 0    | 0    |
| C | 0.19 | 0.09 | 0    | 0    | 0    | 0.02 | 0.04 | 0    | 0    | 0    |

**B** Start at CDR3 position 3 (24.43%)

|   | 2 | 3    | 4    | 5    | 6    | 7    | 8    | 9    | 10   | 11   |
|---|---|------|------|------|------|------|------|------|------|------|
| G | 0 | 0.88 | 1.76 | 5.1  | 5.34 | 4.53 | 2.2  | 1.09 | 0.4  | 0.13 |
| S | 0 | 5.6  | 1.28 | 1.33 | 1.27 | 1.36 | 0.91 | 0.4  | 0.16 | 0.05 |
| T | 0 | 3.58 | 1.24 | 1.82 | 1.36 | 0.8  | 0.59 | 0.24 | 0.07 | 0.04 |
| A | 0 | 0.33 | 0.83 | 1.16 | 1.42 | 1.25 | 0.98 | 0.47 | 0.17 | 0.08 |
| R | 0 | 3.37 | 1.53 | 1.45 | 1.07 | 1.03 | 0.59 | 0.22 | 0.13 | 0.04 |
| L | 0 | 0.15 | 1.93 | 1.22 | 1    | 0.55 | 0.56 | 0.36 | 0.17 | 0.06 |
| P | 0 | 0.07 | 3.42 | 0.82 | 0.86 | 0.52 | 0.56 | 0.37 | 0.13 | 0.02 |
| I | 0 | 0.61 | 0.72 | 0.23 | 0.17 | 0.24 | 0.22 | 0.14 | 0.1  | 0.02 |
| D | 0 | 0.07 | 0.85 | 0.96 | 0.64 | 0.67 | 0.51 | 0.36 | 0.2  | 0.04 |
| V | 0 | 0.08 | 0.52 | 0.52 | 0.6  | 0.65 | 0.47 | 0.26 | 0.08 | 0.05 |
| Q | 0 | 0.14 | 0.74 | 0.74 | 0.86 | 0.36 | 0.25 | 0.13 | 0.02 | 0.01 |
| E | 0 | 0.1  | 0.54 | 0.59 | 0.48 | 0.41 | 0.33 | 0.15 | 0.08 | 0.04 |
| N | 0 | 1.1  | 0.34 | 0.16 | 0.16 | 0.32 | 0.29 | 0.17 | 0.11 | 0.03 |
| M | 0 | 0.31 | 0.25 | 0.13 | 0.15 | 0.08 | 0.09 | 0.1  | 0.02 | 0.01 |
| F | 0 | 0.07 | 0.35 | 0.29 | 0.26 | 0.21 | 0.19 | 0.13 | 0.06 | 0.02 |
| Y | 0 | 0.02 | 0.26 | 0.22 | 0.24 | 0.28 | 0.22 | 0.2  | 0.05 | 0.03 |
| W | 0 | 0.05 | 0.46 | 0.28 | 0.28 | 0.13 | 0.13 | 0.04 | 0.04 | 0.01 |
| H | 0 | 0.06 | 0.31 | 0.13 | 0.16 | 0.2  | 0.15 | 0.2  | 0.05 | 0.02 |
| K | 0 | 1    | 0.32 | 0.2  | 0.07 | 0.08 | 0.11 | 0.07 | 0.05 | 0.04 |
| C | 0 | 0.05 | 0    | 0    | 0.01 | 0    | 0    | 0.01 | 0.01 | 0.01 |

**C** Start at CDR3 position 4 (50.77%)

|   | 2 | 3 | 4    | 5    | 6    | 7    | 8    | 9    | 10   | 11   |
|---|---|---|------|------|------|------|------|------|------|------|
| G | 0 | 0 | 0.53 | 5.14 | 5.03 | 5.44 | 3.37 | 1.5  | 0.55 | 0.22 |
| S | 0 | 0 | 1.26 | 1.77 | 1.85 | 1.71 | 1.26 | 0.69 | 0.38 | 0.09 |
| T | 0 | 0 | 2.11 | 1.6  | 2.04 | 1.16 | 0.67 | 0.4  | 0.17 | 0.08 |
| A | 0 | 0 | 0.7  | 1.11 | 1.62 | 1.95 | 1.25 | 0.7  | 0.21 | 0.13 |
| R | 0 | 0 | 0.82 | 2.09 | 1.36 | 1.22 | 0.81 | 0.46 | 0.2  | 0.07 |
| L | 0 | 0 | 1.22 | 1.56 | 1.76 | 0.85 | 0.73 | 0.42 | 0.23 | 0.05 |
| P | 0 | 0 | 2.1  | 1.1  | 1.06 | 0.68 | 0.74 | 0.45 | 0.16 | 0.07 |
| I | 0 | 0 | 5.81 | 0.33 | 0.27 | 0.22 | 0.23 | 0.23 | 0.11 | 0.03 |
| D | 0 | 0 | 0.15 | 0.86 | 0.86 | 0.61 | 0.57 | 0.5  | 0.34 | 0.13 |
| V | 0 | 0 | 0.8  | 0.66 | 0.65 | 0.65 | 0.66 | 0.38 | 0.16 | 0.08 |
| Q | 0 | 0 | 0.19 | 0.83 | 1.06 | 0.51 | 0.36 | 0.08 | 0.04 | 0.03 |
| E | 0 | 0 | 0.26 | 0.52 | 0.36 | 0.42 | 0.3  | 0.22 | 0.12 | 0.05 |
| N | 0 | 0 | 0.3  | 0.25 | 0.19 | 0.3  | 0.26 | 0.24 | 0.14 | 0.06 |
| M | 0 | 0 | 2.23 | 0.17 | 0.1  | 0.13 | 0.15 | 0.09 | 0.02 | 0.01 |
| F | 0 | 0 | 0.4  | 0.41 | 0.25 | 0.32 | 0.22 | 0.18 | 0.1  | 0.04 |
| Y | 0 | 0 | 0.21 | 0.36 | 0.19 | 0.37 | 0.31 | 0.27 | 0.12 | 0.04 |
| W | 0 | 0 | 0.28 | 0.59 | 0.34 | 0.21 | 0.09 | 0.1  | 0.07 | 0.03 |
| H | 0 | 0 | 0.1  | 0.18 | 0.19 | 0.15 | 0.2  | 0.22 | 0.12 | 0.05 |
| K | 0 | 0 | 0.37 | 0.22 | 0.09 | 0.1  | 0.12 | 0.08 | 0.04 | 0.03 |
| C | 0 | 0 | 0    | 0.01 | 0    | 0.01 | 0.01 | 0.01 | 0.02 | 0    |

**D** Start at CDR3 position 5 (17.44%)

|   | 2 | 3 | 4 | 5    | 6    | 7    | 8    | 9    | 10   | 11   |
|---|---|---|---|------|------|------|------|------|------|------|
| G | 0 | 0 | 0 | 5.18 | 6.36 | 6.82 | 4.6  | 2.4  | 1.15 | 0.36 |
| S | 0 | 0 | 0 | 1.55 | 1.93 | 2.2  | 1.58 | 1.09 | 0.45 | 0.13 |
| T | 0 | 0 | 0 | 0.9  | 1.26 | 1.46 | 1.03 | 0.6  | 0.29 | 0.15 |
| A | 0 | 0 | 0 | 2.42 | 2.25 | 2.21 | 1.71 | 1.2  | 0.25 | 0.08 |
| R | 0 | 0 | 0 | 1.36 | 1.5  | 1.58 | 1.05 | 0.67 | 0.4  | 0.19 |
| L | 0 | 0 | 0 | 0.68 | 2.42 | 0.99 | 0.81 | 0.53 | 0.35 | 0.19 |
| P | 0 | 0 | 0 | 0.41 | 1.92 | 0.68 | 0.91 | 0.65 | 0.34 | 0.15 |
| I | 0 | 0 | 0 | 0.3  | 0.3  | 0.28 | 0.32 | 0.37 | 0.13 | 0.06 |
| D | 0 | 0 | 0 | 3.66 | 0.7  | 0.82 | 0.8  | 0.66 | 0.51 | 0.24 |
| V | 0 | 0 | 0 | 2.76 | 0.67 | 0.68 | 0.77 | 0.59 | 0.17 | 0.11 |
| Q | 0 | 0 | 0 | 0.45 | 0.77 | 0.69 | 0.48 | 0.14 | 0.06 | 0.02 |
| E | 0 | 0 | 0 | 1.19 | 0.5  | 0.44 | 0.41 | 0.16 | 0.18 | 0.03 |
| N | 0 | 0 | 0 | 0.28 | 0.21 | 0.4  | 0.35 | 0.33 | 0.13 | 0.14 |
| M | 0 | 0 | 0 | 0.23 | 0.09 | 0.09 | 0.17 | 0.13 | 0.03 | 0.02 |
| F | 0 | 0 | 0 | 0.33 | 0.35 | 0.28 | 0.24 | 0.27 | 0.19 | 0.04 |
| Y | 0 | 0 | 0 | 0.33 | 0.35 | 0.35 | 0.42 | 0.33 | 0.16 | 0.14 |
| W | 0 | 0 | 0 | 0.45 | 0.5  | 0.35 | 0.2  | 0.09 | 0.05 | 0.01 |
| H | 0 | 0 | 0 | 0.08 | 0.3  | 0.2  | 0.24 | 0.21 | 0.14 | 0.02 |
| K | 0 | 0 | 0 | 0.22 | 0.19 | 0.15 | 0.13 | 0.11 | 0.08 | 0.06 |
| C | 0 | 0 | 0 | 0    | 0.01 | 0    | 0.01 | 0    | 0.01 | 0.02 |

Supplemental Figure 4

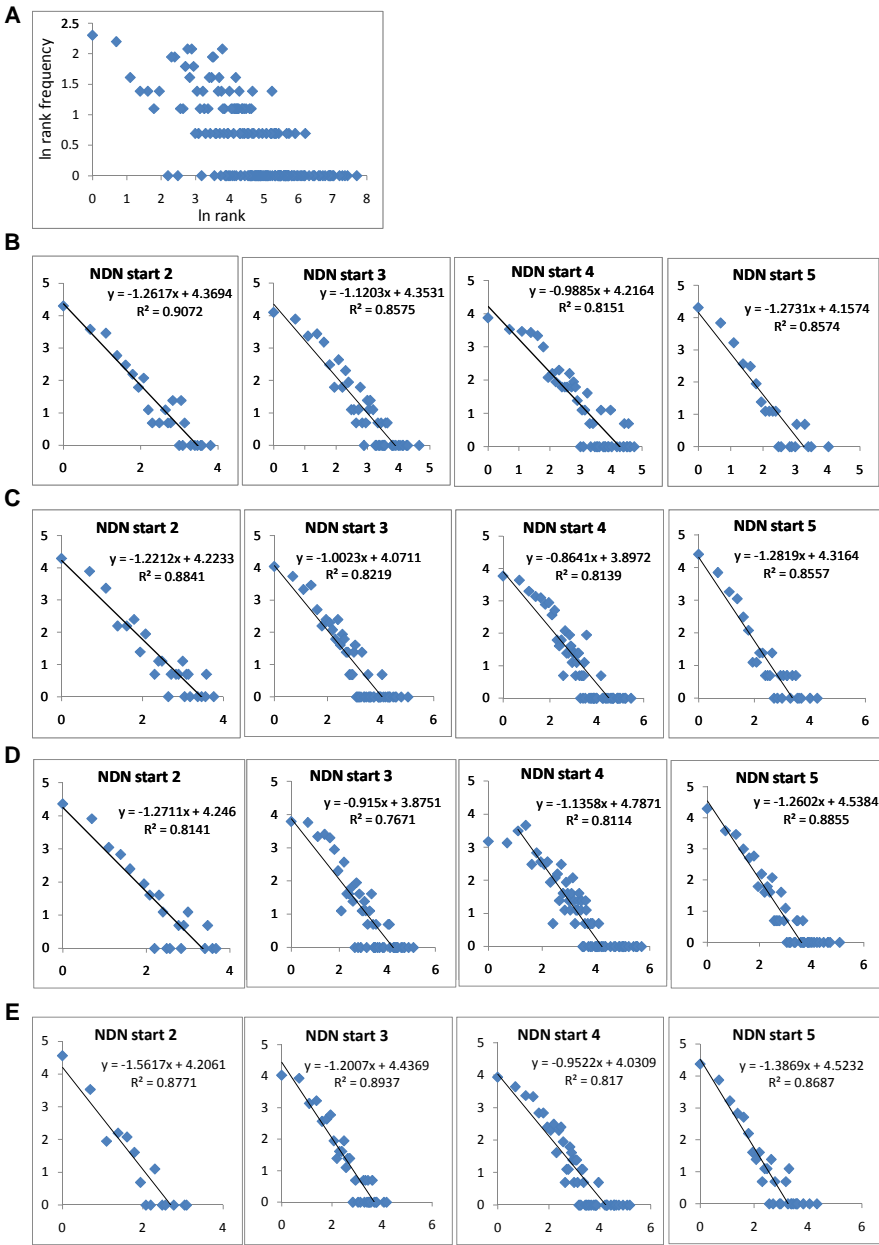

Supplement: NIHMS740998-supplement-1.pdf [file NIHMS740998-supplement-1.pdf]
